# Supplementary material
Source: publisher site journal article supplement (https://www.degruyterbrill.com/publication/journal_key/HTMP/downloadAsset/HTMP_Peer-Review%20Standards.pdf)
Supplement: Supplementary file [file HTMP_Peer-Review%20Standards.pdf]

# Peer review standards

## A. TIME STANDARDS

For each peer review activity performed by Editor we are planning a maximum amount of time measured in days.

**STEP 1.** Editor makes a list of referees and sends out the review requests [7 days]

**STEP 2.** Editor collects the reviews [4 weeks = 28 days = about 1 month]

**STEP 3.** Editor makes decision (Accept / Reject / Revise) [3 days]

**STEP 4.** In case "Revise", Editor gives the author time to correct a paper (if author exceeds, paper can only be treated as a new submission). Number of days Author has to revise submission:

First Revision: [up to 28 days]

Subsequent Revisions: [up to 14 days]

**STEP 5.** Editor sends corrected manuscript to referees for back-refereeing (if the referees wanted to see it again) and collects back-reviews. Number of days to review the revised article: [14 days]

**STEP 6.** Editor sends a paper to the author for final minor corrections according to back-review and gets the corrected manuscript back [14 days]

**STEP 7.** Editor makes decision (Accept / Reject) [3 days]

Total time target for Editors:

- if "Revise" not required: 38 days (7+28+3)

- if "Revise" required (but without a back-review): 69 days (7+28+3+28+3)

REMARK: The editorial process very often proceeds without steps 5,6.

## B. REVIEW STANDARDS

Number of reports required:

research article: 2

surveys: 3

## C. REMARKS:

Our Editors are expected to:

- try to meet peer review standards in our everyday editorial work
- promote the journal in the material sciences community in order to attract better submissions
- solicit interesting new articles

Our Editors are working in the online manuscript processing system called Editorial Manager.

We assume close contacts and cooperation between the Editors and the Managing Editor.
